# Supplementary material
Source: PubMed Central journal article supplement (PMC1890839)
Supplement: blood_blood-2007-01-069831_1.pdf [file blood_blood-2007-01-069831_1.pdf]

The following Cancer and Leukemia Group B institutions, principal investigators, and cytogeneticists participated in this study:

Wake Forest University School of Medicine, Winston-Salem, NC: David D. Hurd, Wendy L. Flejter and Mark J. Pettenati (grant no. CA03927); North Shore–Long Island Jewish Health System, Manhasset, NY: Daniel R. Budman and Prasad R. K. Koduru (grant no. CA35279); The Ohio State University Medical Center, Columbus, OH: Clara D. Bloomfield, Karl S. Theil, Diane Minka and Nyla A. Heerema (grant no. CA77658); Roswell Park Cancer Institute, Buffalo, NY: Ellis G. Levine and AnneMarie W. Block (grant no. CA02599); Washington University School of Medicine, St Louis, MO: Nancy L. Bartlett, Michael S. Watson and Jaime Garcia-Heras (grant no. CA77440); University of Massachusetts Medical Center, Worcester, MA: Mary Ellen Taplin, Kathleen Richkind, Michael J. Mitchell and Patricia Miron (grant no. CA37135); Dana Farber Cancer Institute, Boston, MA: George P. Canellos, Paola Dal Cin, Cynthia C. Morton, Leonard L. Atkins, and Ramana Tantravahi (grant no. CA32291); University of Iowa Hospitals, Iowa City, IA: Gerald H. Clamon and Shivanand R. Patil (grant no. CA47642); Dartmouth Medical School, Lebanon, NH: Marc S. Ernstoff and Thuluvancheri K. Mohandas (grant no. CA04326); Duke University Medical Center, Durham, NC: Jeffrey Crawford and Mazin B. Qumsiyeh (grant no. CA47577); Vermont Cancer Center, Burlington, VT: Hyman B. Muss and Elizabeth F. Allen (grant no. CA77406); University of North Carolina at Chapel Hill: Thomas C. Shea and Kathleen W. Rao (grant no. CA47559); Christiana Care Health Services, Inc., Newark, DE: Stephen S. Grubbs, Jeanne M. Meck, and Digamber S. Borgaonkar (grant no. CA45418); Massachusetts General Hospital, Boston, MA: Michael L. Grossbard, Cynthia C. Morton and Paola Dal

Cin (grant no. CA 12449); Eastern Maine Medical Center CCOP, Bangor, ME: Philip L. Brooks and Laurent J. Beauregard (grant no. CA35406); University of Chicago Medical Center, Chicago, IL: Gini Fleming, Diane Roulston, Katrin M. Carlson and Michelle M. LeBeau (grant no. CA41287); Weill Medical College of Cornell University, New York, NY: Scott Wadler, Andrew J. Carroll and Prasad R. K. Koduru (grant no. CA07968); University of Puerto Rico School of Medicine, San Juan, PR: Enrique Velez-Garcia, Paola Dal Cin, Cynthia C. Morton, and Leonard L. Atkins; University of California at San Diego: Stephen L. Seagren and Marie L. Dell'Aquila (grant no. CA11789); Mount Sinai School of Medicine, New York, NY: Lewis R. Silverman and Vesna Najfeld (grant no. CA04457); University of Missouri/Ellis Fischel Cancer Center, Columbia, MO: Michael C. Perry and Tim Huang (grant no. CA12046); Ft. Wayne Medical Oncology/Hematology, Ft. Wayne, IN: Sreenivasa Nattam and Patricia I. Bader; Virginia Commonwealth University MB CCOP, Richmond, VA: John D. Roberts and Colleen Jackson-Cook (grant no. CA52784); University of Illinois at Chicago: Thomas E. Lad and Maureen M. McCorquodale (grant no. CA74811); Western Pennsylvania Hospital, Pittsburgh, PA: Richard K. Shadduck and Gerard R. Diggans; Georgetown University Medical Center, Washington, DC: Edward P. Gelmann and Jeanne M. Meck (grant no. CA77597); Southern Nevada Cancer Research Foundation, Las Vegas, NV: John Ellerton and Renée Bernstein (grant no. CA35421); Rhode Island Hospital, Providence, RI: William Sikov, Shelly L. Kerman and Aurelia Meloni-Ehrig (grant no. CA08025); SUNY Upstate Medical University, Syracuse, NY: Stephen L. Graziano and Constance K. Stein (grant no. CA21060); Long Island Jewish Medical Center, Lake Success, NY: Kanti R. Rai and Prasad R. K. Koduru (grant no. CA11028); University of Alabama at

Birmingham: Robert Diasio and Andrew J. Carroll (grant no. CA47545); University of Tennessee Memphis Cancer Center: Harvey B. Niell and Sugandhi A. Tharapel (grant no. CA47555); Walter Reed Army Medical Center, Washington, DC: Joseph J. Drabeck and Digamber S. Borgaonkar (grant no. CA26806); Medical University of South Carolina, Charleston, SC: Mark R. Green and G. Shashidhar Pai (grant no. CA03927); University of Nebraska Medical Center, Omaha, NE: Margaret A. Kessinger Wegner and Warren G. Sanger (grant no. CA77298); University of California at San Francisco: Alan P. Venook and Kathleen E. Richkind (grant no. CA60138); University of Minnesota, Minneapolis, MN: Bruce A. Peterson and Betsy A. Hirsch (grant no. CA16450).
