# Supplementary material
Source: PubMed Central journal article supplement (PMC1890839)
Supplement: blood_blood-2007-01-069831_2.pdf [file blood_blood-2007-01-069831_2.pdf]

| Study                                | No. of pts with/without <i>MLL</i> -PTD <sup>a</sup> | Age range (y)      | Induction Regimen Included Etoposide | Postremission treatment of pts with <i>MLL</i> -PTD <sup>b</sup> |                  |                  | Comparison of clinical outcome of CN-AML pts with/without <i>MLL</i> -PTD |          |                    |                 |                 |                 | No. (%) <sup>c</sup> of pts with <i>MLL</i> -PTD in CR1 beyond 2 y |
|--------------------------------------|------------------------------------------------------|--------------------|--------------------------------------|------------------------------------------------------------------|------------------|------------------|---------------------------------------------------------------------------|----------|--------------------|-----------------|-----------------|-----------------|--------------------------------------------------------------------|
|                                      |                                                      |                    |                                      | Chemo-therapy only                                               | Auto SCT in CR1  | Allo SCT in CR1  | CR rates (%)                                                              | <i>P</i> | CRD median (mo)    | <i>P</i>        | OS median (mo)  | <i>P</i>        |                                                                    |
| <b>Current study</b>                 | 24/214                                               | 18-59              | yes                                  | 4                                                                | 18               | 0                | 92/83                                                                     | .39      | 12/30 <sup>d</sup> | .55             | not reached/44  | .67             | 9 (41)                                                             |
| <b>Döhner et al.<sup>9</sup></b>     | 18/203                                               | 16-60              | yes                                  | 8                                                                | 2                | 3                | 89/78                                                                     | .74      | 8/19               | .02             | 13.4/20         | .43             | 0 <sup>e</sup>                                                     |
| <b>Caligiuri et al.<sup>7</sup></b>  | 11/87                                                | 18-84              | no <sup>f</sup>                      | 7                                                                | 0                | 0                | 70 <sup>g</sup> /71                                                       | 1.0      | 7/23               | .01             | 13.8/20.1       | .06             | 1 (14)                                                             |
| <b>Schnittger et al.<sup>8</sup></b> | 10/30                                                | 50-73 <sup>h</sup> | no                                   | 7                                                                | 0                | 0                | 71 <sup>i</sup> /NR                                                       | NR       | NR <sup>j</sup>    | NR <sup>j</sup> | NR <sup>j</sup> | NR <sup>j</sup> | 0                                                                  |
| <b>Studel et al.<sup>k</sup></b>     | 8/161                                                | 16-60              | yes                                  | no <sup>l</sup>                                                  | yes <sup>l</sup> | yes <sup>l</sup> | NR                                                                        | NR       | 3/20 <sup>d</sup>  | NS              | NR              | NR              | NR                                                                 |
| <b>Yu et al.<sup>m</sup></b>         | 7/27                                                 | NR <sup>n</sup>    | no                                   | yes <sup>l</sup>                                                 | yes <sup>l</sup> | yes <sup>l</sup> | NR                                                                        | NR       | NR                 | NR              | 2.7/6.8         | NS              | NR                                                                 |
| <b>Shiah et al.<sup>17</sup></b>     | 5/NA                                                 | NR                 | no                                   | 1                                                                | 0                | 1                | 40/NR                                                                     | NR       | NR <sup>o</sup>    | NR <sup>o</sup> | NR <sup>o</sup> | NR <sup>o</sup> | 1 (50)                                                             |
| <b>Muñoz et al.<sup>10</sup></b>     | 5/25                                                 | 16-60              | yes                                  | no <sup>l</sup>                                                  | yes <sup>l</sup> | yes <sup>l</sup> | NR                                                                        | NR       | NR <sup>p</sup>    | NR <sup>p</sup> | NR              | NR              | 1 (NR)                                                             |

Pts indicates patients; SCT, stem-cell transplantation; auto SCT, autologous SCT; allo SCT, allogeneic SCT; CR, complete remission; CR1, first CR; CRD, CR duration; OS, overall survival; NR, not reported, NS, not significant.

<sup>a</sup> Numbers of patients with a normal karyotype for whom outcome data are available.

<sup>b</sup> Numbers of patients receiving postremission treatment, if available.

<sup>c</sup> Percent calculated among patients who achieved a CR.

<sup>d</sup> Median disease-free survival.

<sup>e</sup> Five patients were censored before 2 years.

<sup>f</sup> Etoposide was included in the induction regimen of 2 (2%) of 96 patients who received induction treatment.

<sup>g</sup> Calculated among patients who received induction treatment (one of 11 patients did not).

<sup>h</sup> Age range provided only for 10 cytogenetically normal patients with *MLL*-PTD.

<sup>i</sup> Calculated among patients with a normal karyotype who received induction treatment (three of 10 patients did not)

<sup>j</sup> Only a comparison of clinical outcome of a group of 15 patients with *MLL*-PTD (including 10 with a normal and 5 with abnormal karyotype) with clinical outcome of a group of 30 age matched karyotypically normal patients was reported. Patients with *MLL*-PTD had shorter OS (median, 5 vs 12 months,  $P=0.006$ ) and relapse-free survival (median, 4 months vs median not reached,  $P<0.001$ ).

<sup>k</sup> Steudel C, Wermke M, Schaich M, et al. Comparative analysis of *MLL* partial tandem duplication and *FLT3* internal tandem duplication mutations in 956 adult patients with acute myeloid leukemia. *Genes Chromosomes Cancer*. 2003;37:237-251.

<sup>l</sup> Based on general description of treatment administered to all patients included in the study. No data on therapy administered in cytogenetically normal patients with or without *MLL*-PTD are provided.

<sup>m</sup> Yu M, Honoki K, Andersen J, Paietta E, Nam DK, Yunis JJ. *MLL* tandem duplication and multiple splicing in adult acute myeloid leukemia with normal karyotype. *Leukemia*. 1996;10:774-780.

<sup>n</sup> Median age of patients with *MLL*-PTD was 62 years and of those without *MLL*-PTD 55 years.

<sup>o</sup> A comparison of clinical outcome of cytogenetically normal patients (both adults and children; numbers of adults and children in each group not reported) with and without *MLL*-PTD revealed no significant differences in CRD (median, not reached vs 10 months,  $P=0.490$ ) and OS (median, 4.5 vs 12 months,  $P=0.164$ ).

<sup>p</sup> 2-year event-free survival rates were 20% for patients with and 66% for patients without *MLL*-PTD ( $P=0.03$ ).
