# Supplementary material
Source: PubMed Central journal article supplement (PMC1890839)

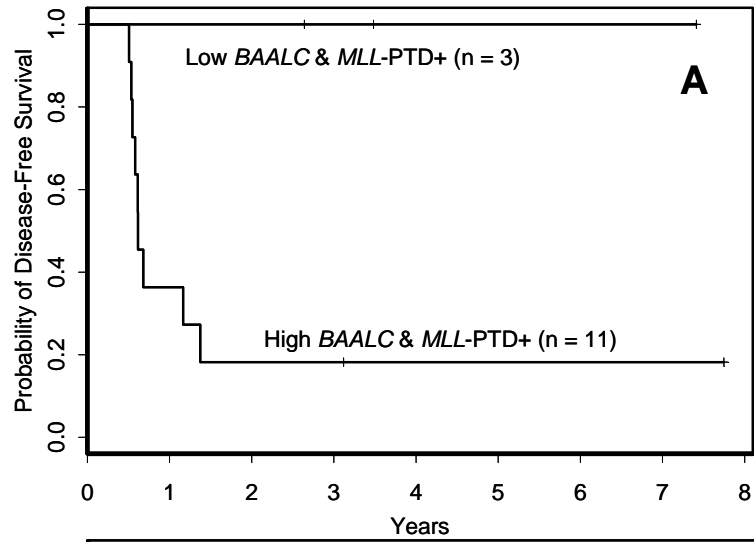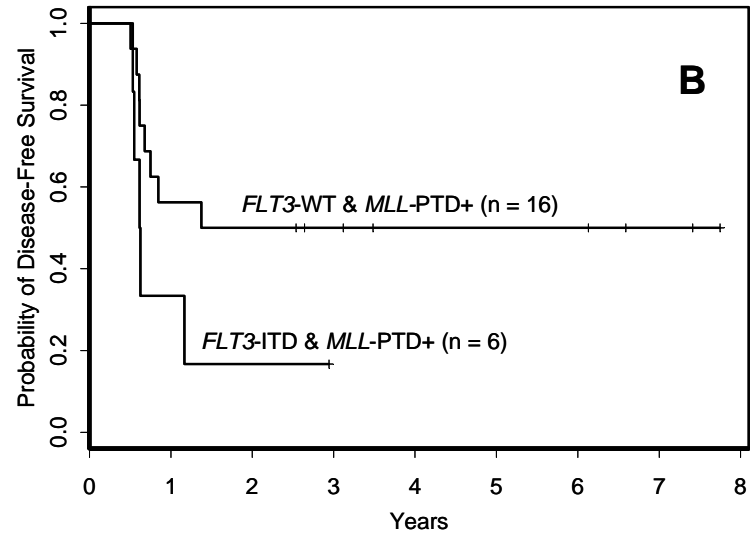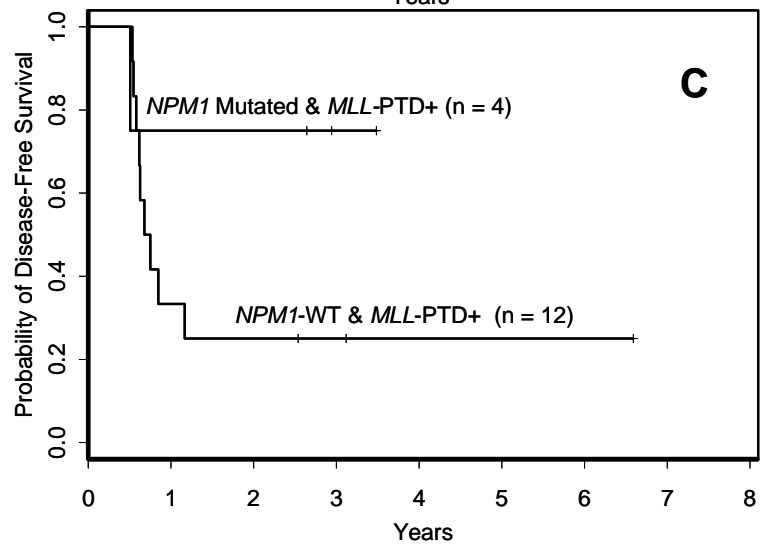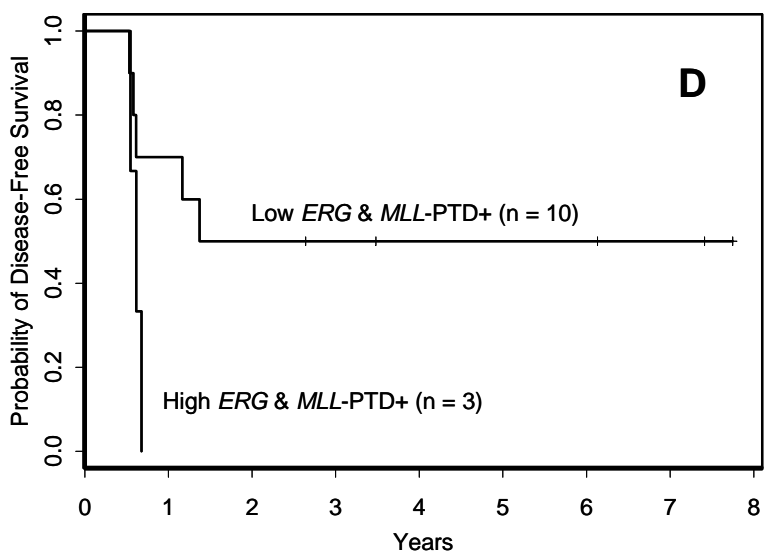

Supplement: blood_blood-2007-01-069831_3.pdf [file blood_blood-2007-01-069831_3.pdf]
